# Supplementary material for: Gracilaria edulis exhibit antiproliferative activity against human lung adenocarcinoma cell line A549 without causing adverse toxic effect in vitro and in vivo
Source: Royal Society of Chemistry journal article supplement (doi:10.1039/c5fo01094b), 2016-01-01
Supplement: c5fo01094b4.pdf [file c5fo01094b4.pdf]

### **Supplementary Figure Legends**

Supplementary Fig. 1. Qualitative phytochemical analysis of GEEA extract. (A) Test for terpenoids (Presence of brown ring). (B) Flavonoids (C) Cardiac Glycosides (Presence of greenish ring in the acidic layer) (D) Alkaloids (Presence of orange colored precipitate) (E) Tannins (F) Anthraquinones (G) Phlobatannins.

Supplementary Fig. 2. Assessment of antiproliferative activity of column fractions against A549 cells at 48 h. The activity was assessed by MTT assay. The fractions 7, 8 and 9 showed maximum and significant antiproliferative activity. The results are expressed as Mean  $\pm$  SD of triplicate values (\* Significance at the level of  $P < 0.05$ ).

Supplementary Fig. 3. Assessment of antiproliferative activity of commercially available phytol against A549 cell line at 24 and 48 h. Phytol effectively inhibited the growth of A549 cells in a dose and time dependent manner. The results are expressed as Mean  $\pm$  SD of triplicate values (\* Significance at the level of  $P < 0.05$ ).
