# Supplementary figures and images for: Gracilaria edulis exhibit antiproliferative activity against human lung adenocarcinoma cell line A549 without causing adverse toxic effect in vitro and in vivo
Source: Royal Society of Chemistry journal article supplement (doi:10.1039/c5fo01094b), 2016-01-01

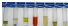

Supplement: c5fo01094b1.pdf [file c5fo01094b1.pdf]

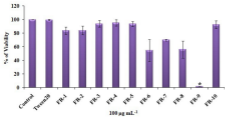

Supplement: c5fo01094b2.pdf [file c5fo01094b2.pdf]

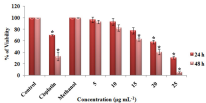

Supplement: c5fo01094b3.pdf [file c5fo01094b3.pdf]
